# Supplementary material
Source: Springer Nature journal article supplement (https://www.springermedizin.de/resource/supplementary/12985_2010_815_MOESM2_ESM.pdf/9609260)
Supplement: MOESM2 [file 9609260]

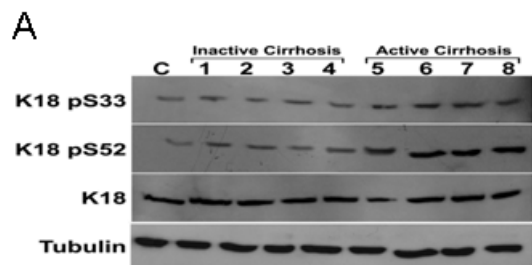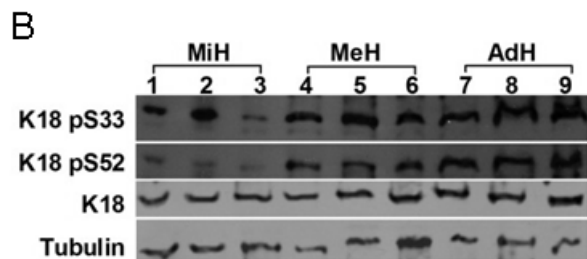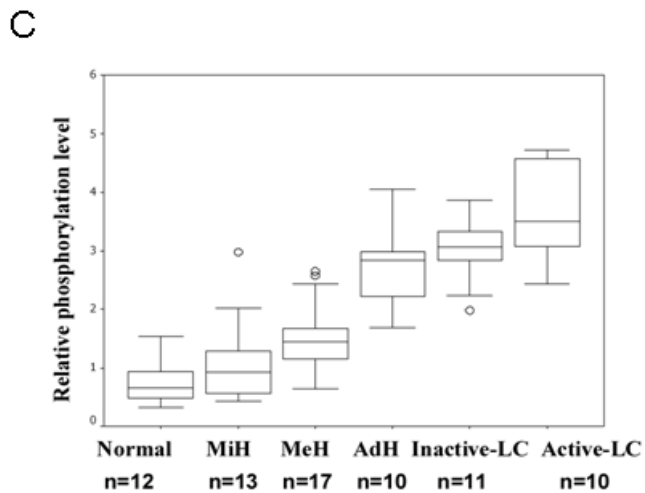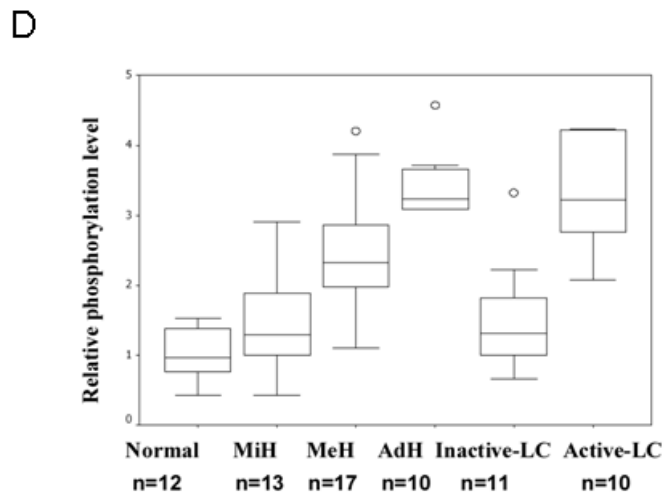

K18 Ser52 phosphorylation in different disease progression stage

K18 Ser33 phosphorylation in different disease progression stage
